# Supplementary material for: Reverse photoluminescence responses of Ln(iii) complexes to methanol vapor clarify the differentiated energy transfer pathway and potential for methanol detection and encryption
Source: Royal Society of Chemistry journal article supplement (doi:10.1039/d0tc04413j), 2020-01-01
Supplement: d0tc04413j1.pdf [file d0tc04413j1.pdf]

## Supporting Information

### 1. Crystal structures

**Table S1.** Crystal data and structure refinement for Eu-1, Eu-2, Tb-2 and Gd-2.

| Complex                              | Eu-1                                                 | Eu-2                                                 | Tb-2                                                 | Gd-2                                                 |
|--------------------------------------|------------------------------------------------------|------------------------------------------------------|------------------------------------------------------|------------------------------------------------------|
| Empirical formula                    | $C_{56}H_{60}N_{14}O_{14}Cl_3Eu$                     | $C_{57}H_{61}Cl_3EuN_{15}O_{13}$                     | $C_{57}H_{61}Cl_3N_{15}O_{13}Tb$                     | $C_{57}H_{61}Cl_3GdN_{15}O_{13}$                     |
| Formula weight                       | 1411.49                                              | 1422.51                                              | 1428.47                                              | 1427.80                                              |
| Temperature/K                        | 293(2)                                               | 150.15                                               | 293(2)                                               | 150.00(10)                                           |
| Crystal system                       | orthorhombic                                         | orthorhombic                                         | orthorhombic                                         | orthorhombic                                         |
| Space group                          | $P2_12_12_1$                                         | $P2_12_12_1$                                         | $P2_12_12_1$                                         | $P2_12_12_1$                                         |
| a/Å                                  | 12.7639(5)                                           | 12.7697(5)                                           | 12.7866(3)                                           | 12.7306(7)                                           |
| b/Å                                  | 21.0583(8)                                           | 20.9395(8)                                           | 21.0103(5)                                           | 20.959(2)                                            |
| c/Å                                  | 22.859(3)                                            | 22.6567(12)                                          | 22.6401(6)                                           | 22.596(3)                                            |
| $\alpha/^\circ$                      | 90                                                   | 90                                                   | 90                                                   | 90                                                   |
| $\beta/^\circ$                       | 90                                                   | 90                                                   | 90                                                   | 90                                                   |
| $\gamma/^\circ$                      | 90                                                   | 90                                                   | 90                                                   | 90                                                   |
| Volume/Å <sup>3</sup>                | 6144.1(8)                                            | 6058.2(5)                                            | 6082.3(2)                                            | 6029.1(11)                                           |
| Z                                    | 4                                                    | 4                                                    | 4                                                    | 4                                                    |
| $\rho_{calc}/g/cm^3$                 | 1.526                                                | 1.560                                                | 1.560                                                | 1.573                                                |
| $\mu/mm^{-1}$                        | 9.145                                                | 1.244                                                | 1.371                                                | 8.985                                                |
| F(000)                               | 2880.0                                               | 2904.0                                               | 2908.0                                               | 2908.0                                               |
| Reflections collected                | 11327                                                | 22808                                                | 13436                                                | 15018                                                |
| Independent reflections              | 8494                                                 | 10479                                                | 9416                                                 | 9726                                                 |
| Data/restraints /parameters          | 8494/297/802                                         | 10479/80/828                                         | 9416/1382/817                                        | 9726/844/811                                         |
| Goof                                 | 1.111                                                | 1.040                                                | 1.027                                                | 1.020                                                |
| Final R indexes [I>>=2 $\sigma$ (I)] | R <sub>1</sub> = 0.1488,<br>wR <sub>2</sub> = 0.3210 | R <sub>1</sub> = 0.0451,<br>wR <sub>2</sub> = 0.1012 | R <sub>1</sub> = 0.0923,<br>wR <sub>2</sub> = 0.2346 | R <sub>1</sub> = 0.0784,<br>wR <sub>2</sub> = 0.1898 |
| Final R indexes [all data]           | R <sub>1</sub> = 0.2317,<br>wR <sub>2</sub> = 0.3790 | R <sub>1</sub> = 0.0573,<br>wR <sub>2</sub> = 0.1089 | R <sub>1</sub> = 0.1087,<br>wR <sub>2</sub> = 0.2534 | R <sub>1</sub> = 0.0954,<br>wR <sub>2</sub> = 0.2145 |

**Table S2.** Selected Bond Lengths (Å) of Eu-1, Eu-2, Tb-2 and Gd-2.

|      |    |           |     |     |           |
|------|----|-----------|-----|-----|-----------|
| Eu-1 |    |           |     |     |           |
| Eu1  | N2 | 2.460(11) | Eu1 | N11 | 2.617(10) |
| Eu1  | N3 | 2.702(10) | Eu1 | N13 | 2.497(12) |
| Eu1  | N4 | 2.457(8)  | Eu1 | N8  | 2.501(12) |
| Eu1  | N6 | 2.540(10) | Eu1 | N10 | 2.706(10) |
| Eu-2 |    |           |     |     |           |
| Eu1  | N1 | 2.488(7)  | Eu1 | N10 | 2.478(7)  |
| Eu1  | N3 | 2.470(7)  | Eu1 | N12 | 2.492(7)  |
| Eu1  | N5 | 2.495(7)  | Eu1 | N14 | 2.675(7)  |
| Eu1  | N7 | 2.694(7)  | Eu1 | N8  | 2.477(7)  |
| Tb-2 |    |           |     |     |           |
| Tb1  | N1 | 2.446(13) | Tb1 | N8  | 2.445(13) |
| Tb1  | N3 | 2.457(13) | Tb1 | N10 | 2.439(14) |
| Tb1  | N4 | 2.468(13) | Tb1 | N12 | 2.470(13) |
| Tb1  | N6 | 2.675(13) | Tb1 | N14 | 2.666(13) |
| Gd-2 |    |           |     |     |           |
| Gd1  | N1 | 2.468(13) | Gd1 | N8  | 2.466(12) |
| Gd1  | N3 | 2.665(12) | Gd1 | N10 | 2.702(12) |
| Gd1  | N4 | 2.445(11) | Gd1 | N11 | 2.480(13) |
| Gd1  | N6 | 2.494(12) | Gd1 | N13 | 2.479(12) |

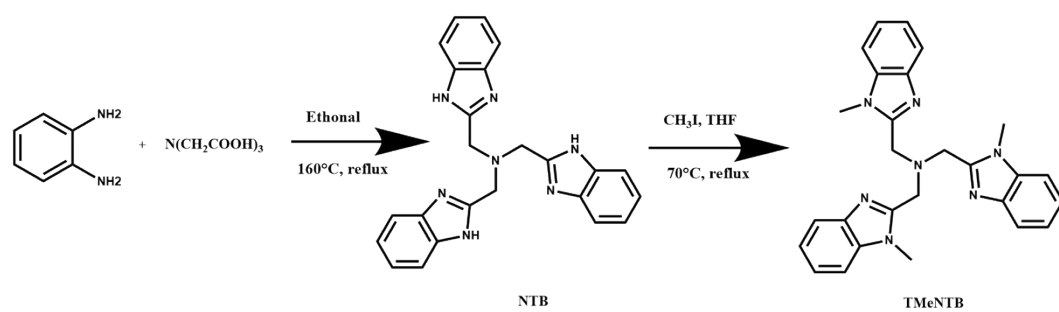

**Scheme S1.** Synthetic route of TMeNTB ligand.

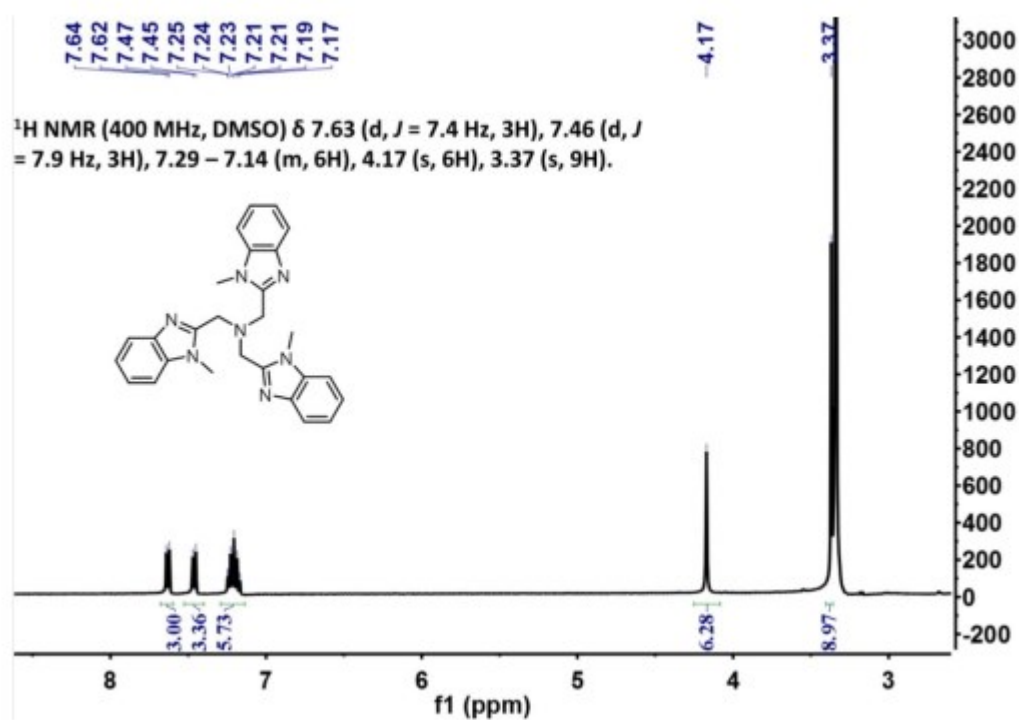

**Fig. S1** The <sup>1</sup>H NMR spectra of TMeNTB ligand.

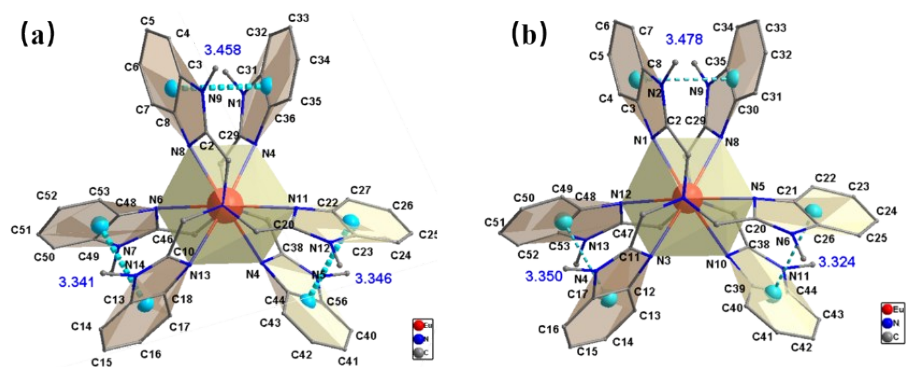

**Fig. S2** Structure of the cationic unit in Eu-1 (a) and Eu-2 (b). Eu red, N blue, C gray, the teal dash lines showing the  $\pi$ - $\pi$  interactions between the BLMs, the light yellow box showing the distorted cubic coordination geometry around the Eu(III) ion.

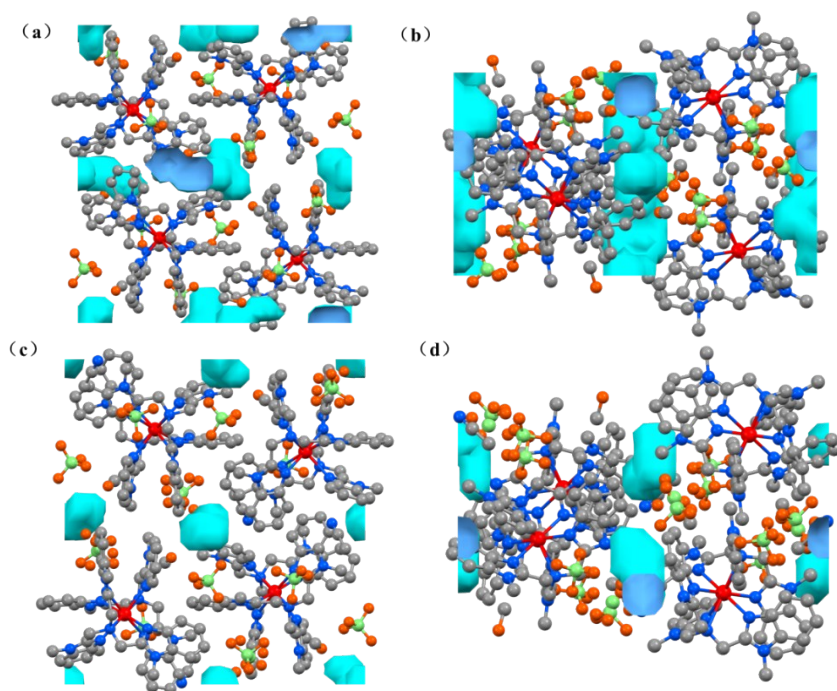

**Fig. S3** The structure of Eu-1 viewed along *a* axis (a) and *b* axis (b). The structure of Eu-2 viewed from *a* axis (c) and *b* axis (d). Eu red, N blue, C gray, O orange, Cl green, and the cyan polyhedron showing the cavities between coordination units.

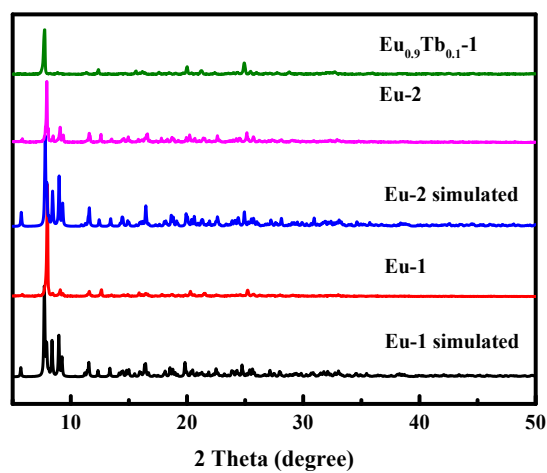

(a)

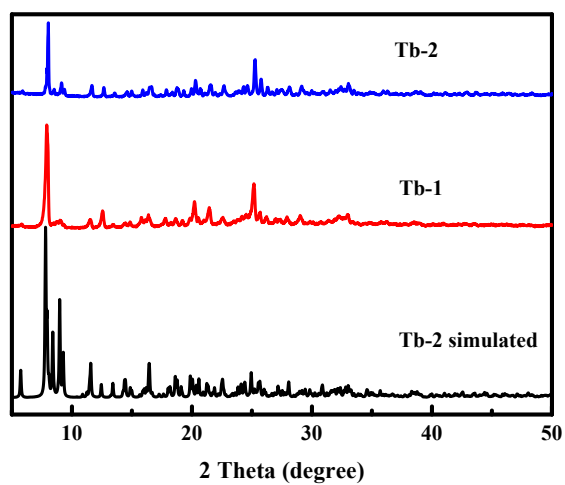

(b)

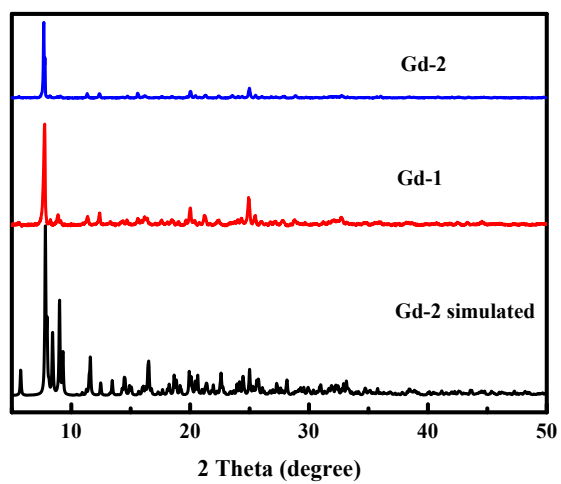

(c)

Fig. S4 PXRD patterns of the Ln-1 and Ln-2 series compared with the simulated.

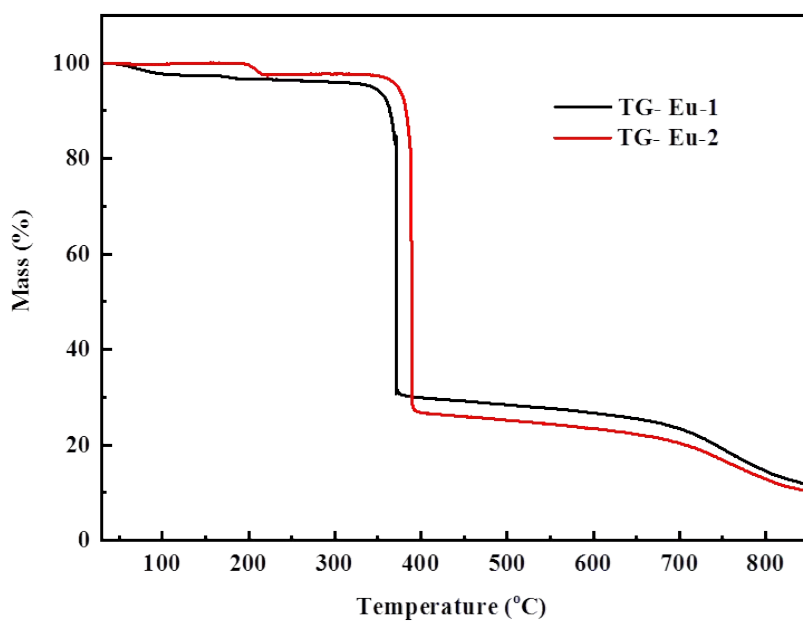

Fig. S5 TG curves of Eu-1 and Eu-2.

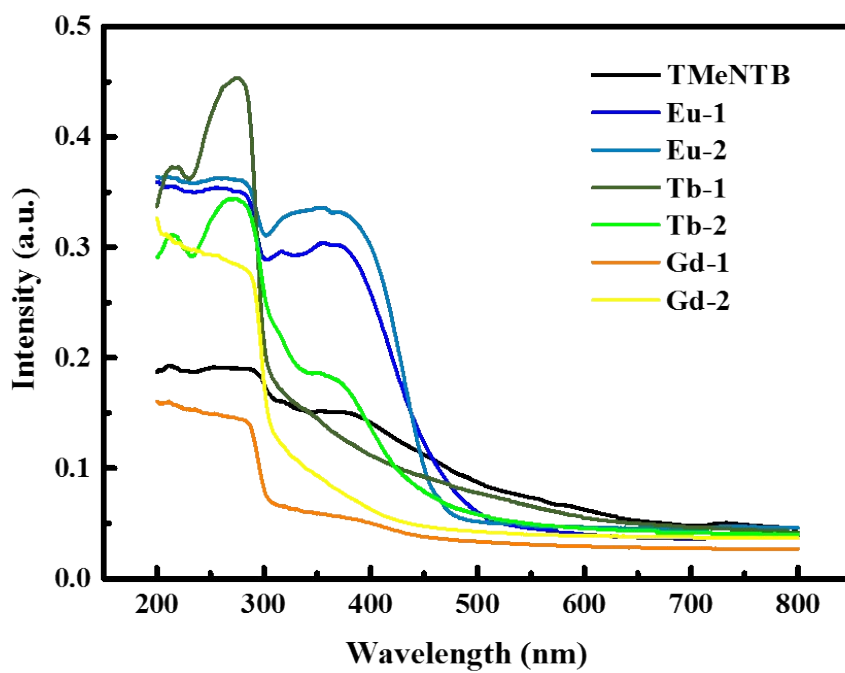

Fig. S6 Solid state UV-visible absorption spectra of TMeNTB, Ln-1 and Ln-2 series.

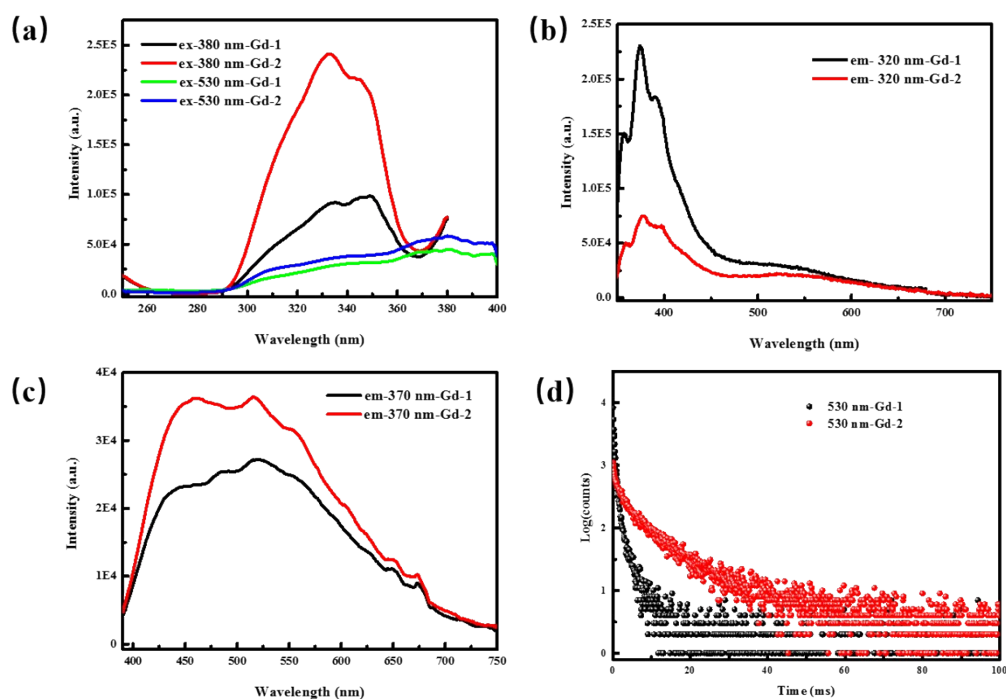

**Fig. S7** (a) The excitation spectra of Gd-1 and Gd-2 ( $\lambda_{em} = 380$  or  $530$  nm); (b) The emission spectra of Gd-1 and Gd-2 ( $\lambda_{ex} = 320$  nm); (c) The emission spectra of Gd-1 and Gd-2 ( $\lambda_{ex} = 370$  nm); (d) The lifetime decay curves of Gd-1 and Gd-2 ( $\lambda_{ex} = 370$  nm,  $\lambda_{em} = 530$  nm).

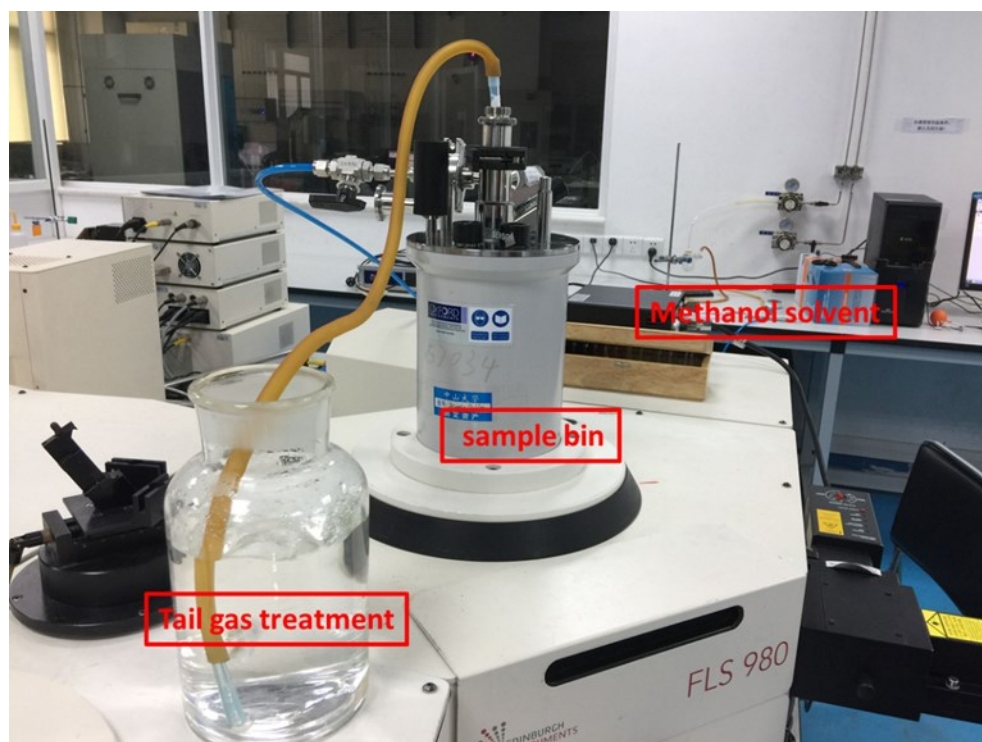

**Fig. S8** Device diagram of sample response to methanol vapor.

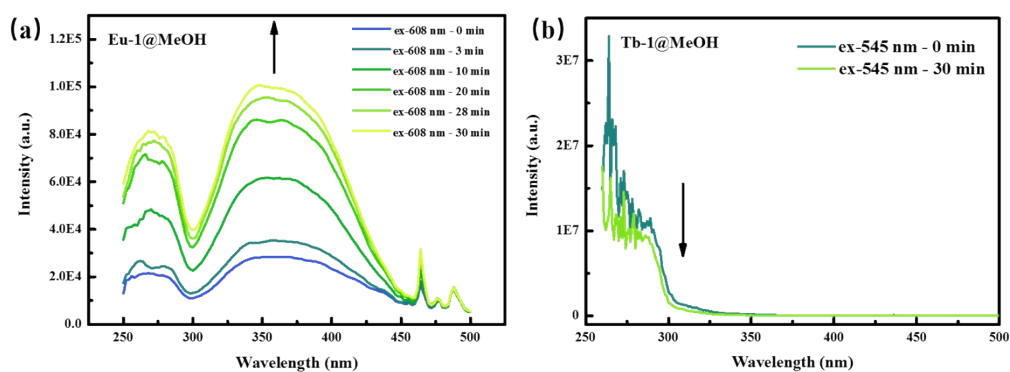

**Fig. S9** The fluorescent excitation spectra of (a) Eu-1, and (b) Tb-1 in the atmosphere of MeOH/N<sub>2</sub> with time at room temperature.

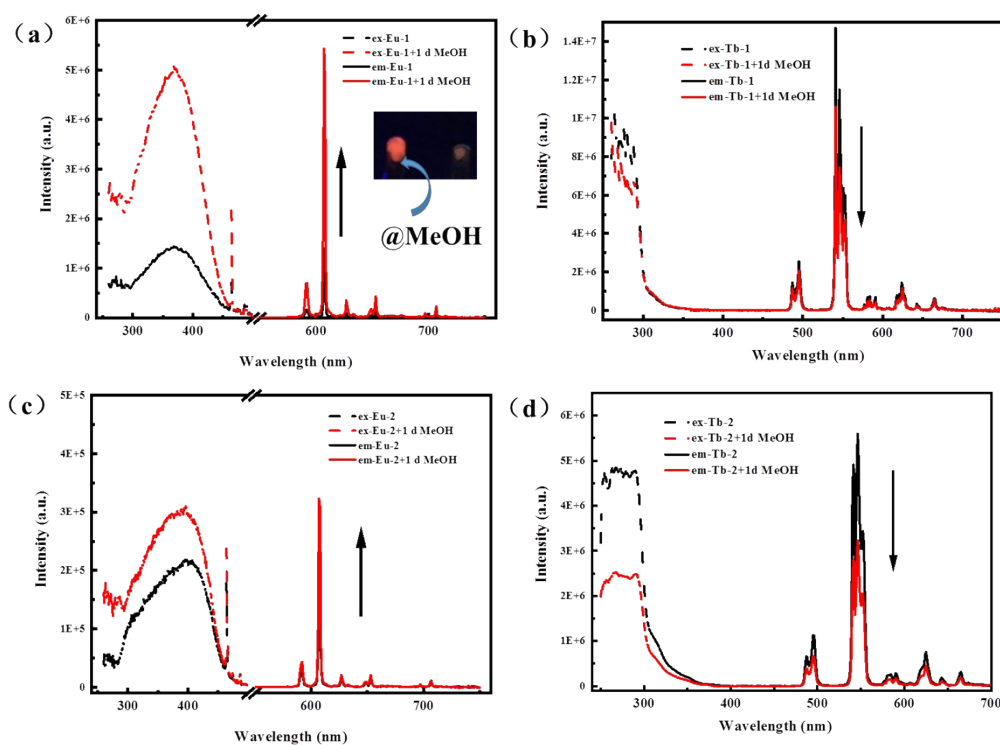

**Fig. S10** The fluorescent excitation and emission spectra of (a) Eu-1, (b) Tb-1, (c) Eu-2, and (d) Tb-2 microcrystalline samples before and after adding one drop of MeOH liquid.



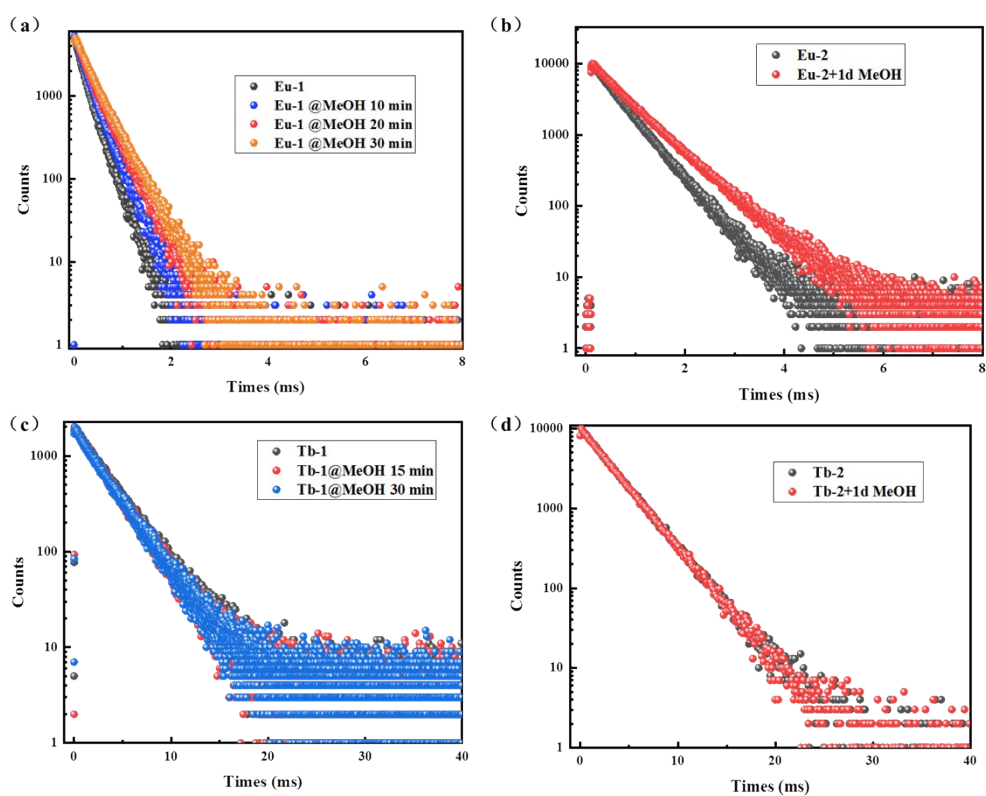

**Fig. S11** The decay curves of Ln-1 and Ln-2 before and after treated with methanol vapor or liquid.

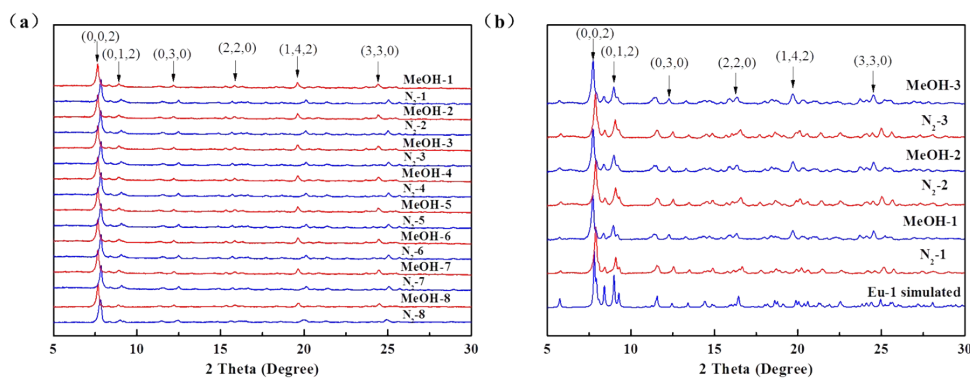

**Fig. S12** The X-ray powder diffraction (PXRD) patterns of (a) Eu-1, and (b) Tb-1 under MeOH/N<sub>2</sub> steam cycles (the number of 1-8 or 1-3 means the cycle number).

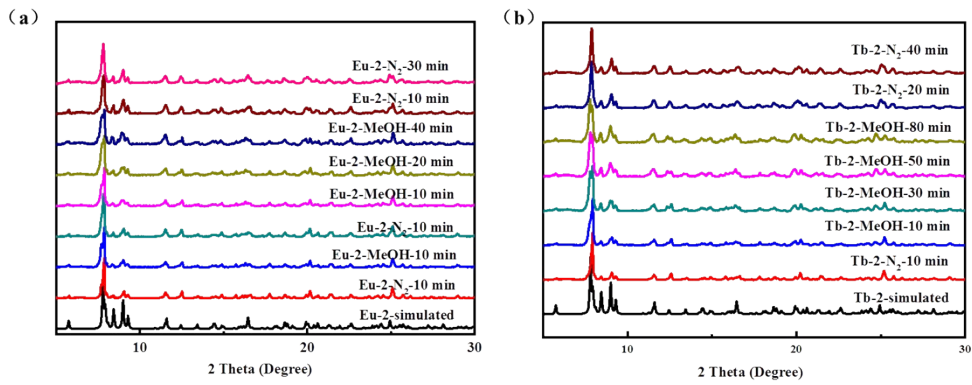

**Fig. S13** The PXRD patterns of (a) Eu-2, and (b) Tb-2 under MeOH/N<sub>2</sub> steam cycle.

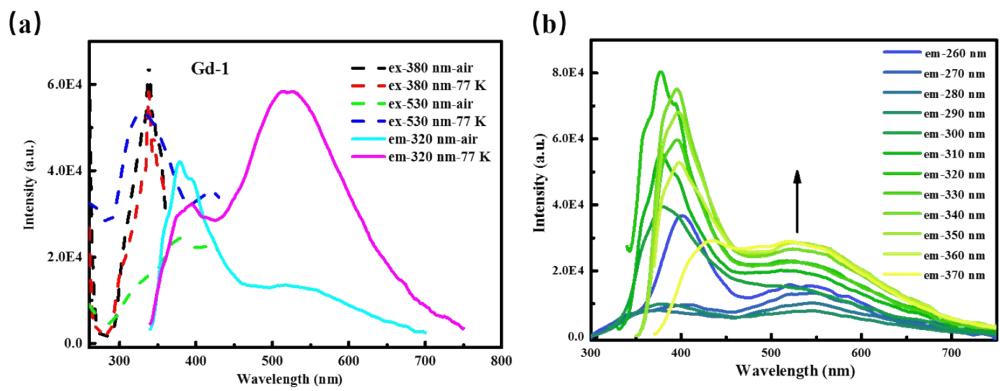

**Fig. S14** (a) The emission spectra and excitation spectra of Gd-1 at r.t. in air and 77 K; (b) The emission spectra of Gd-1 excited by different excitation wavelength.

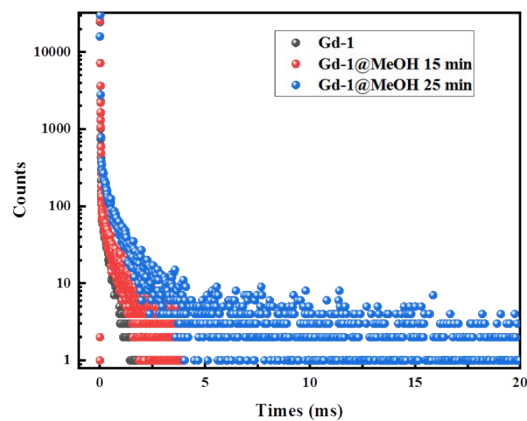

**Fig. S15** The decay curves of Gd-1 before and after treated with methanol vapor.

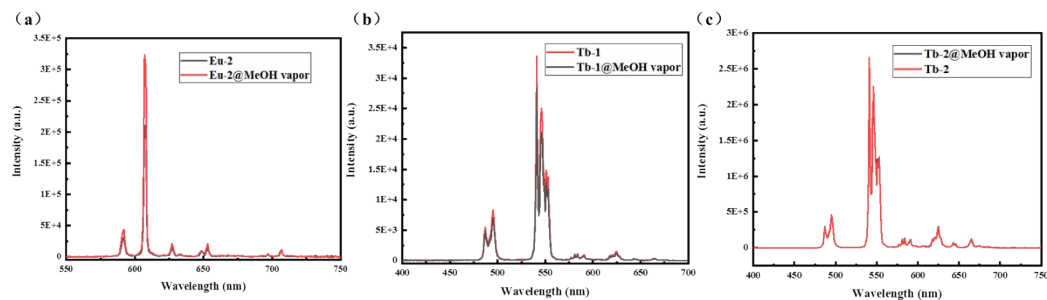

**Fig. S16** The emission spectra of (a) Eu-2, (b) Tb-1 and (c) Tb-2 film before and after treated with MeOH vapor for 30 min.

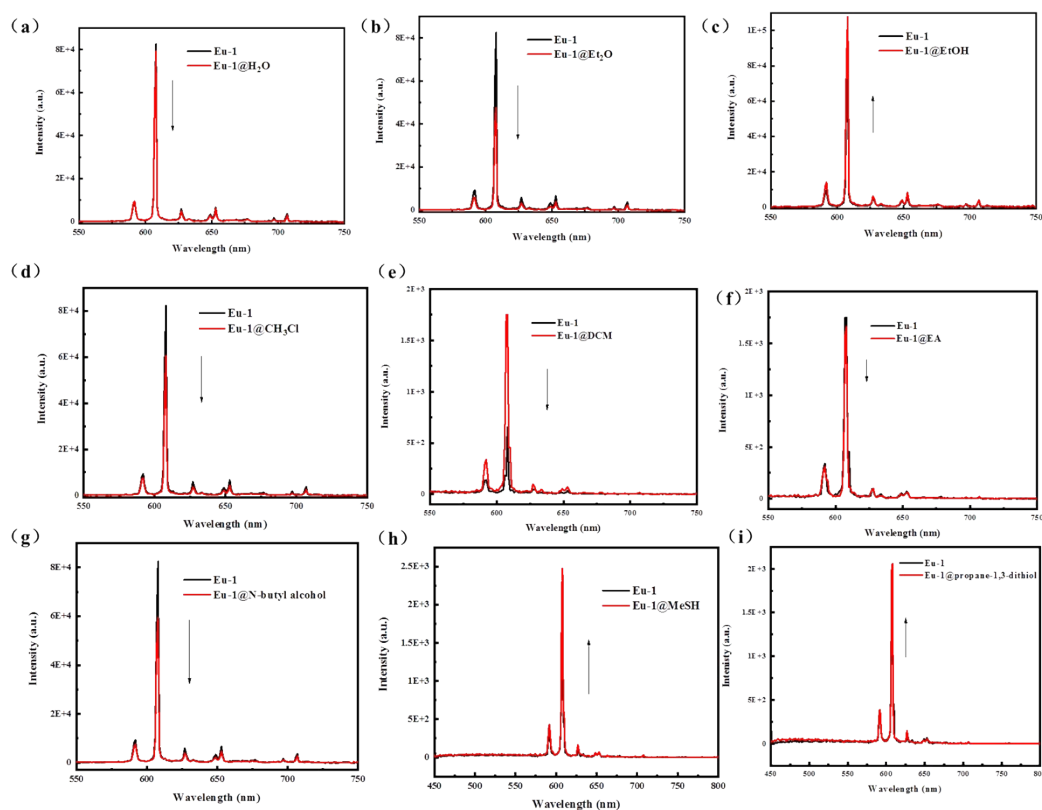

**Fig. S17** The emission spectra of Eu-1 before and after treated with (a) H<sub>2</sub>O, (b) Et<sub>2</sub>O, (c) EtOH, (d) CH<sub>3</sub>Cl, (e) DCM, (f) EA, (g) *n*-butyl alcohol, (h) MeSH, (i) propane-1,3-dithiol vapors.

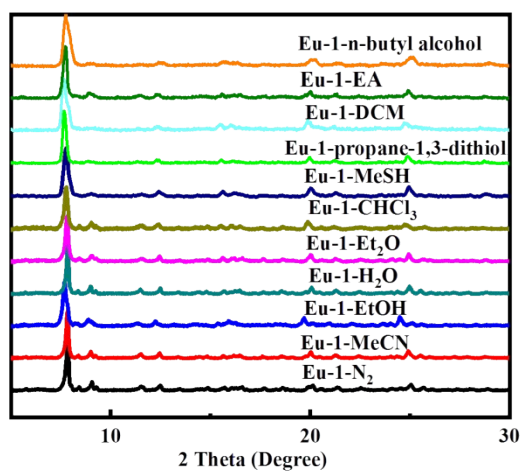

**Fig. S18** The PXRD of Eu-1 before and after treated with H<sub>2</sub>O, Et<sub>2</sub>O, EtOH, CH<sub>3</sub>Cl, DCM, EA, n-butyl alcohol, MeSH, propane-1,3-dithiol vapors.

Table S3 The absolute photoluminescence quantum yield of Ln-1 and Ln-2 (Ln=Eu, Tb, Gd).

| <b>Sample</b> | <b><math>\lambda_{\text{ex}}</math> (nm)</b> | <b>PLQY (%)</b> |
|---------------|----------------------------------------------|-----------------|
| Eu-1          | 370                                          | 10              |
| Eu-2          | 370                                          | 28              |
| Tb-1          | 280                                          | 72              |
| Tb-2          | 280                                          | 87              |
| Gd-1          | 370                                          | 4.3             |
| Gd-2          | 370                                          | 5.3             |

Table S4 The lifetime of Gd-1 in the atmosphere of MeOH at different times.

| <b>Sample</b>    | <b>530 nm</b> | <b>Lifetime (<math>\mu\text{s}</math>)</b> | <b>Rel. (%)</b> |
|------------------|---------------|--------------------------------------------|-----------------|
| Gd-1@MeOH-0 min  | $\tau_1$      | 3.80                                       | 12.9            |
|                  | $\tau_2$      | 332.38                                     | 87.1            |
|                  | $\tau$        | 336.18                                     |                 |
| Gd-1@MeOH-15 min | $\tau_1$      | 16.50                                      | 15.94           |
|                  | $\tau_2$      | 512.92                                     | 84.06           |
|                  | $\tau$        | 529.41                                     |                 |
| Gd-1@MeOH-25 min | $\tau_1$      | 99.70                                      | 46.53           |
|                  | $\tau_2$      | 612.98                                     | 53.47           |
|                  | $\tau$        | 712.68                                     |                 |
